# Supplementary material for: Opinions regarding skin ageing in the elderly inhabitants of Bialystok, Poland
Source: PeerJ. 2016 May 11;4:e2028. doi: 10.7717/peerj.2028 (PMC4867704; doi:10.7717/peerj.2028)
Supplement: Data S1 [file peerj-04-2028-s001.xlsx]

## Sheet: DATA
number of respondent	study group	sex	Age	marital status	placeof residence	financial situation	level of education	family stucture	Are you treat due to an illness?	What kind of skin you have?	Have you ever had skin problems?	You are tanning in the sun?	You are tanning in the solarium?	Are you protecting your skin with special protective preparations?	Do you use creams?	Do you use tonics?	Do you use masks?	Do you use olives?	Do you use lotions?	Do you use peelings?	Are you walking to beauty salons?	Have you noticed in yourself qualities of skin aging?	Do you think that factor in the skin aging are infections?	Do you think that factor in skin aging is the general condition of the organism?	Do you think that factor in the skin aging is tanning?	Do you think that factor in skin aging is smoking?	Do you think that factor in aging is contamination?	Do you think that factor in aging is to use cosmetics too young?	Do you think that factor in aging is stress?	Do you think that factor in skin aging are genetic burdens?	Do you think that the stigma of the skin is paleness?	Do you think that the stigma of the skin is onychorrhexis?	Do you think that the stigma of the skin is hyperkeratosis?	Do you think that the stigma of the skin is irregular skin pigmentation?	Do you think that the stigma of the skin are lentigo?	Do you think that the stigma of the skin is diffuse thinning hair?	Do you think that the stigma of the skin is the formation of bubbles?	Do you think that the stigma of the skin is slowing down the process of wound healing?	Do you think that the stigma of the skin is rough and graying hair?	Do you think that the stigma of the skin are telangiectasia?	Do you think that the stigma of the skin is drying?	Do you think that the stigma of the skin are wrinkles?	Do you think that the stigma of the skin is to reduce the insulation and protective properties of the skin?	Do you think that the stigma of the skin is increased incidence of benign and malignant tumors of epithelial origin?	Do you think that the stigma of the skin is flaccidity?	Stigmata of the skin - I don't know	Is cutaneous lesions may reflect disease processes occurring in other organs?	The most common skin problems - warts	The most common skin problems - vesicular diseases
1	1	2	2	1	1	3	3	1	2	1	2	2	3	3	1	0	0	0	0	0	0	1	0	1	0	0	0	0	0	0	0	0	0	1	1	1	0	0	1	0	0	0	0	0	1	0	3	0	0
2	1	1	2	1	1	3	2	2	1	3	1	2	3	3	1	0	0	0	0	0	0	1	0	0	0	0	0	0	1	0	0	0	0	1	0	0	0	0	1	1	1	1	0	0	1	0	3	0	0
3	1	2	2	1	1	2	1	2	2	2	2	2	3	1	1	0	0	0	0	0	0	1	0	1	1	1	0	0	0	0	0	0	1	0	1	0	0	0	1	0	0	1	0	0	0	0	1	0	0
4	1	1	1	4	1	2	1	1	2	2	2	2	3	1	1	1	0	0	1	1	0	2	0	1	1	1	0	0	1	0	0	0	0	1	1	0	0	0	0	0	1	0	0	0	1	0	1	0	0
5	1	1	1	4	1	2	1	1	2	2	2	2	3	1	1	1	0	0	1	1	0	2	0	1	1	1	0	0	1	0	0	0	0	1	1	0	0	0	0	0	1	1	0	0	1	0	2	0	0
6	1	1	2	3	1	2	1	4	2	7	2	1	2	1	1	1	1	0	1	0	0	1	0	1	0	1	0	0	0	1	0	0	0	0	1	0	0	0	1	1	1	1	0	0	1	0	3	0	0
7	1	1	2	1	1	3	1	1	2	2	1	1	2	1	1	0	1	0	1	0	0	1	0	1	0	0	0	0	0	0	0	0	0	1	1	0	0	0	1	0	1	1	0	0	0	0	3	0	0
8	1	1	1	2	1	3	2	3	2	7	2	1	3	1	1	0	0	0	1	0	0	1	0	1	0	0	0	0	0	0	0	0	0	1	0	0	0	0	1	1	0	1	0	0	1	0	1	0	0
9	1	1	2	3	1	2	1	1	2	7	2	2	3	1	1	0	1	1	1	1	0	1	0	0	1	1	0	0	1	1	0	0	1	1	1	0	0	0	1	1	1	1	0	0	1	0	1	1	0
10	1	1	2	1	1	2	1	1	2	2	2	2	3	1	1	0	0	0	0	0	0	1	0	1	1	1	0	0	1	1	0	0	0	1	1	0	0	0	1	1	1	1	1	0	1	0	1	0	0
11	1	2	1	1	1	2	2	3	1	8	1	2	3	3	1	0	0	0	0	0	0	1	0	1	0	0	0	1	1	0	0	0	0	0	1	1	0	0	1	0	0	1	0	0	1	0	3	0	0
12	1	2	2	1	1	2	1	2	1	2	2	3	3	1	1	0	0	0	0	0	0	1	0	0	0	0	1	0	0	0	0	0	0	0	0	1	0	1	0	0	1	0	0	0	0	0	3	0	0
13	1	2	2	1	1	3	1	2	2	2	3	2	3	3	1	0	0	0	0	0	0	1	0	1	0	0	0	0	1	0	0	0	0	0	0	0	0	0	0	0	0	1	0	0	1	0	3	0	0
14	1	1	1	1	1	3	1	1	2	2	2	1	2	3	1	0	0	0	0	0	0	1	0	1	1	1	1	0	1	1	0	0	1	1	0	0	0	0	1	0	1	1	0	0	0	0	1	0	0
15	1	2	2	1	1	2	1	2	2	8	2	1	2	1	1	0	0	0	0	0	0	1	0	1	0	1	0	0	1	1	1	0	1	1	1	0	0	0	1	1	0	1	0	0	1	0	1	0	0
16	1	2	2	1	1	3	1	1	2	8	2	2	2	3	1	0	0	0	0	0	0	3	0	1	0	1	0	0	1	0	0	0	0	0	1	1	0	0	1	0	0	1	0	0	1	0	3	0	0
17	1	1	1	1	5	2	2	2	1	3	1	3	3	3	1	0	0	0	1	0	0	1	0	1	1	1	0	0	0	0	1	0	1	1	1	0	0	1	0	0	1	1	1	0	1	0	1	0	0
18	1	2	1	1	5	3	2	4	2	2	2	2	3	3	0	0	0	1	0	0	0	1	0	1	0	0	0	0	0	0	0	0	0	0	0	0	0	0	1	0	0	1	0	0	0	0	2	0	0
19	1	1	1	1	1	1	1	1	1	4	1	1	3	1	1	1	1	1	1	1	1	1	0	1	0	0	0	0	0	1	0	0	1	1	0	0	0	0	1	0	1	1	0	0	1	0	1	1	0
20	1	1	2	1	1	2	2	1	1	2	2	2	3	1	1	0	0	0	0	0	0	1	0	1	0	0	0	0	0	1	0	0	0	0	0	0	0	0	0	0	0	1	0	0	1	0	1	0	0
21	1	1	2	4	1	2	1	2	2	3	2	2	3	1	1	1	0	0	0	0	0	1	0	1	0	0	0	0	0	0	0	0	0	0	0	1	0	0	1	0	0	1	0	0	0	0	1	0	0
22	1	2	2	1	1	2	2	3	2	7	2	3	3	1	1	0	0	1	0	0	0	1	1	1	1	1	0	0	0	0	0	0	0	1	0	1	0	0	1	0	1	1	0	0	1	0	1	1	0
23	1	1	1	1	1	2	2	3	2	7	2	3	3	1	1	1	1	1	1	1	1	1	1	1	1	1	1	0	0	0	0	0	0	1	0	0	0	0	1	1	1	1	0	0	1	0	1	1	0
24	1	1	1	2	1	3	2	2	2	3	2	1	3	3	1	0	0	0	1	0	0	1	0	1	1	1	0	0	0	1	0	1	0	1	1	1	0	0	1	1	1	1	0	0	1	0	1	1	0
25	1	1	2	1	1	2	3	1	2	3	2	1	3	1	1	0	1	1	1	1	0	1	0	1	0	1	0	0	1	1	0	1	1	1	1	1	0	0	1	1	1	1	0	0	1	0	1	1	0
26	1	1	2	2	1	3	2	3	1	3	1	2	3	3	1	0	0	0	0	0	0	1	0	1	1	1	0	0	1	0	0	1	1	1	1	1	0	0	1	1	1	1	1	0	1	0	3	0	0
27	1	1	2	2	1	2	1	2	2	3	1	2	3	1	1	0	0	0	1	1	0	1	0	1	1	1	0	0	1	0	1	0	1	1	0	0	0	0	1	0	0	1	0	0	1	0	3	0	0
28	1	2	2	1	5	2	1	2	2	1	2	3	3	1	0	0	0	0	0	1	0	2	0	1	1	1	0	0	0	0	0	0	0	1	1	1	0	1	1	1	0	1	0	0	1	0	1	0	0
29	1	1	2	2	1	6	2	4	2	7	2	1	3	1	1	1	0	0	1	1	0	1	0	1	0	0	1	0	0	0	0	1	0	0	0	1	0	0	0	0	0	1	0	0	0	0	3	0	0
30	1	1	2	2	1	2	2	1	1	2	3	2	3	1	1	0	0	1	1	1	0	1	1	1	0	0	1	0	0	0	0	1	0	1	0	0	0	0	1	0	0	1	0	0	0	0	1	0	1
31	1	1	2	2	1	3	2	3	2	2	3	3	3	3	1	0	0	0	0	0	0	1	1	0	0	0	0	0	1	0	1	0	0	0	0	0	0	0	1	0	0	1	0	0	0	0	3	0	0
32	1	1	1	2	1	3	2	3	2	4	1	2	3	1	1	0	0	0	1	1	0	1	0	1	0	0	0	0	1	0	0	1	0	0	0	0	0	0	1	1	1	1	0	0	0	0	3	0	0
33	1	2	2	1	1	2	2	2	1	7	2	2	3	1	1	0	0	0	0	0	0	1	0	1	0	0	0	0	0	0	0	1	0	0	0	0	0	0	1	0	0	1	0	0	0	0	3	1	0
34	1	1	2	1	1	2	1	2	1	1	1	2	3	3	1	0	0	0	0	1	0	1	0	0	1	1	1	0	0	1	0	1	1	1	1	0	0	0	1	1	1	1	0	0	1	0	3	1	0
35	1	1	2	3	1	3	1	1	2	4	2	2	3	3	1	0	0	0	0	0	0	3	0	0	0	0	0	1	0	0	0	0	1	0	0	0	0	0	1	0	0	0	0	0	0	0	3	0	0
36	1	1	1	2	1	3	1	3	1	3	2	2	3	1	1	1	1	0	0	0	0	1	0	1	1	1	0	0	1	1	1	1	0	1	0	1	0	0	1	0	1	1	0	0	1	0	1	1	0
37	1	1	2	1	1	2	2	3	2	2	2	2	3	3	1	0	0	0	0	0	0	1	0	1	0	1	0	0	0	1	0	0	0	0	1	1	0	0	1	0	0	1	0	0	0	0	1	1	0
38	1	2	2	1	1	2	2	2	1	8	2	1	2	3	0	1	0	0	0	0	0	1	0	1	0	0	0	0	0	0	0	0	0	0	0	0	0	0	0	0	0	0	0	0	1	0	3	0	0
39	1	1	2	2	1	3	3	2	2	4	1	3	3	3	1	0	0	0	0	0	0	2	0	1	1	0	1	0	0	1	0	0	0	0	0	0	0	0	1	1	1	0	0	0	0	0	3	1	0
40	1	1	2	1	1	2	1	2	2	3	1	3	3	1	1	0	0	1	0	0	0	1	0	1	1	1	0	1	0	1	0	0	1	1	1	0	0	0	1	0	1	1	1	0	1	0	1	0	0
41	1	1	1	4	1	2	1	2	2	5	1	3	3	3	1	0	0	0	1	1	0	1	1	1	1	1	0	0	0	0	0	0	1	1	0	1	0	0	1	0	1	1	0	0	1	0	1	1	0
42	1	1	1	1	1	2	2	3	2	3	2	2	3	1	1	0	1	0	0	1	0	1	0	1	1	1	0	0	0	0	0	0	1	1	1	0	0	0	1	0	1	1	0	0	1	0	3	0	0
43	1	1	1	1	1	2	2	3	2	3	2	1	3	1	1	1	1	0	0	1	1	1	0	1	1	1	0	1	0	1	0	0	1	1	1	0	0	1	1	1	1	1	0	1	1	0	1	0	0
44	1	1	1	4	1	3	2	1	2	2	2	2	3	1	1	1	0	0	1	0	0	1	0	0	0	1	0	0	1	0	0	0	1	1	1	0	0	0	1	0	0	0	0	0	0	0	3	1	0
45	1	2	1	1	1	2	1	2	1	2	2	3	3	1	1	0	0	0	0	0	0	1	0	0	0	0	1	0	0	0	0	0	0	0	0	1	0	1	0	0	1	0	0	0	0	0	3	0	0
46	1	2	2	2	1	2	1	3	2	1	2	1	1	1	1	0	0	0	0	0	0	1	0	0	0	1	0	0	0	0	0	1	0	0	0	0	0	0	0	0	1	1	0	0	0	0	1	1	0
47	1	1	2	1	1	3	1	2	2	2	2	3	3	1	1	0	0	0	0	0	0	1	0	0	1	1	1	0	0	0	1	0	0	0	1	0	0	0	1	0	0	1	0	0	1	0	1	0	0
48	1	1	1	2	1	2	2	2	2	7	2	3	3	4	1	0	0	0	0	0	0	3	0	0	0	1	0	0	1	0	0	0	0	0	1	0	0	0	1	1	0	1	0	0	0	0	3	0	0
49	1	2	2	2	1	2	4	1	2	7	2	1	3	3	1	0	0	0	0	0	0	1	1	0	0	0	0	0	0	0	1	0	0	0	0	0	0	0	0	0	0	0	0	0	0	0	1	1	0
50	1	1	1	1	1	3	2	2	2	2	2	2	3	1	1	0	0	0	0	0	0	1	0	1	1	1	1	0	1	1	1	1	1	1	1	1	1	1	1	1	1	1	1	1	1	0	1	0	1
51	1	1	2	2	1	2	1	1	2	3	1	2	3	1	1	0	0	0	0	0	0	1	0	0	1	0	0	0	1	0	0	1	0	1	1	1	0	0	0	0	1	1	0	0	1	0	2	0	0
52	1	1	1	2	1	2	1	2	2	3	2	2	3	1	1	0	0	1	0	0	0	1	0	1	0	0	0	0	1	0	0	1	1	1	1	0	0	0	1	1	0	1	0	0	1	0	1	1	0
53	1	1	2	2	1	2	1	1	2	3	2	3	3	1	1	0	1	1	0	0	1	1	0	1	1	1	0	0	1	0	0	0	1	0	1	0	0	0	1	1	1	1	0	0	1	0	1	0	0
54	1	1	2	1	1	2	2	3	2	3	2	2	3	1	1	0	0	0	1	0	0	1	0	1	0	0	0	0	1	0	0	1	1	1	1	0	0	0	0	0	1	1	0	0	1	0	1	1	0
55	1	2	2	1	1	1	1	3	2	2	1	2	3	1	1	0	0	0	0	0	0	3	0	0	1	0	0	0	0	0	0	0	0	1	0	0	0	0	1	0	0	0	0	0	1	0	3	1	0
56	1	1	2	1	1	3	2	2	2	2	2	2	3	1	1	1	1	1	1	0	0	1	0	1	1	1	0	0	1	1	0	1	0	1	0	0	0	0	1	1	0	1	0	0	1	0	1	0	0
57	1	1	2	1	1	2	1	2	1	3	1	1	3	1	0	0	0	1	1	0	0	1	0	0	1	0	0	0	0	1	0	0	1	0	0	0	0	0	1	1	1	1	0	0	1	0	1	1	0
58	1	1	2	2	1	2	2	1	2	7	2	3	3	1	1	0	0	0	0	0	0	1	0	1	0	1	0	0	0	0	0	0	0	0	0	0	0	0	0	0	0	0	0	0	0	1	1	1	0
59	1	1	1	4	1	2	1	3	2	5	2	2	3	1	1	0	0	0	1	0	0	1	0	0	0	0	0	0	1	0	0	0	0	0	0	0	0	0	0	0	0	0	0	0	1	0	3	0	0
60	1	1	2	3	1	3	2	1	2	3	2	2	3	1	1	0	0	0	1	0	0	1	0	1	0	0	0	0	0	1	0	1	0	1	0	0	0	0	1	0	1	1	0	0	1	0	3	0	0
61	1	1	2	2	1	2	1	2	2	3	2	2	3	3	1	0	0	0	0	0	0	3	0	1	0	0	0	0	0	1	0	1	0	0	1	0	0	0	0	1	0	1	0	0	1	0	3	0	0
62	1	1	1	2	5	3	1	1	2	2	1	2	2	1	1	0	0	0	0	0	0	1	0	1	0	0	1	0	0	1	0	0	0	1	1	0	0	1	0	0	0	1	0	0	1	0	1	1	0
63	1	2	2	1	1	2	2	1	1	4	2	1	3	1	1	0	0	0	1	0	0	1	0	1	0	0	0	0	0	0	0	0	0	0	0	0	0	0	1	0	1	0	0	0	1	0	2	0	0
64	1	2	2	1	5	3	1	1	2	8	2	1	3	3	1	0	0	0	0	0	0	3	0	1	0	0	0	0	0	1	1	0	0	0	0	0	0	0	0	0	1	1	0	0	1	0	3	1	0
65	1	1	2	2	1	2	2	3	2	3	2	2	2	3	1	0	0	0	0	0	0	1	1	0	1	1	0	0	1	0	0	1	0	0	0	1	1	0	1	0	1	1	0	0	0	0	1	1	0
66	1	1	2	2	1	3	1	1	2	4	2	3	3	1	1	0	1	0	0	0	0	1	0	0	1	1	0	0	1	0	0	0	0	0	1	0	0	0	0	0	0	1	0	0	1	0	3	0	0
67	1	1	1	2	1	2	1	1	2	7	2	1	3	1	1	1	0	0	1	0	0	1	0	1	1	0	0	0	0	0	0	0	0	0	1	1	0	0	0	0	1	1	0	0	0	0	3	0	0
68	1	1	2	2	1	2	2	2	2	2	2	3	3	3	0	1	0	0	0	0	0	2	0	0	0	1	0	0	1	1	0	1	0	0	0	0	0	0	0	0	0	0	0	0	0	0	3	1	0
69	1	1	1	2	1	3	2	1	2	2	2	3	3	3	1	0	0	0	0	0	0	2	0	1	0	0	0	0	0	0	0	0	0	0	0	0	0	0	0	0	0	0	0	0	0	1	3	0	0
70	1	1	2	2	1	2	1	1	2	2	2	2	3	3	1	0	0	0	0	0	0	2	0	0	1	0	0	0	0	0	0	0	0	0	1	0	0	0	0	0	0	1	0	0	0	0	3	1	0
71	1	1	2	2	1	2	1	2	2	4	2	2	3	1	1	0	0	0	0	0	0	1	0	1	0	0	0	0	0	0	0	0	0	0	0	0	0	0	0	0	0	1	0	0	0	0	3	0	0
72	1	1	1	2	1	2	2	2	2	7	2	3	3	1	1	0	0	0	0	0	0	1	0	1	0	0	0	0	0	0	0	0	0	0	0	0	0	0	0	0	0	0	0	0	1	0	3	0	0
73	1	1	2	1	1	3	2	1	2	3	2	2	3	1	1	1	1	0	0	0	0	1	0	0	1	1	0	1	1	0	0	1	1	0	1	0	0	0	1	0	1	1	0	0	0	0	1	1	0
74	1	1	2	1	1	3	1	2	2	1	2	1	3	4	1	0	0	0	0	0	0	3	0	0	0	0	0	0	1	0	0	0	0	0	0	0	0	0	0	0	0	0	0	0	0	1	3	0	0
75	1	1	2	2	1	3	1	1	1	4	1	1	3	1	1	0	0	1	0	0	0	1	0	1	0	0	0	0	1	1	0	1	1	0	0	1	0	0	1	0	0	1	0	0	1	0	3	0	0
76	1	1	2	2	1	2	1	1	2	7	2	2	3	3	1	1	0	0	0	1	0	1	0	1	0	0	0	0	0	0	0	1	0	0	0	0	0	0	0	0	1	1	0	0	1	0	1	0	0
77	1	1	2	2	1	3	2	1	1	2	1	1	2	3	1	0	0	0	1	1	0	2	0	1	0	1	1	0	1	1	1	1	0	1	1	1	0	0	1	0	1	1	1	0	1	0	2	0	1
78	1	1	1	1	1	2	2	3	2	3	2	1	3	3	1	0	0	0	1	0	0	3	0	0	0	1	0	0	1	1	0	0	0	0	0	0	0	0	0	0	0	0	0	0	0	1	1	1	0
79	1	1	1	2	1	2	2	4	2	3	2	3	3	1	1	0	0	0	0	0	0	1	0	0	0	0	0	0	1	1	0	0	0	0	0	0	0	0	0	0	1	1	0	0	1	0	3	1	0
80	1	1	2	2	1	3	2	1	2	5	2	3	3	1	1	0	0	0	0	0	0	1	0	0	0	0	1	0	0	0	0	1	0	0	0	0	0	1	0	0	0	1	0	0	0	0	3	0	0
81	1	1	2	1	1	2	2	4	1	2	2	1	3	3	1	0	0	0	0	0	0	1	0	0	1	0	0	0	0	0	0	0	0	0	0	0	0	0	1	0	0	0	0	0	0	0	1	0	0
82	1	1	2	4	1	3	1	1	2	3	3	1	1	3	0	0	0	1	0	0	0	1	0	1	0	0	0	1	0	1	1	1	1	1	1	1	0	1	1	0	0	1	0	0	1	0	3	0	0
83	1	1	2	1	1	2	2	2	2	2	2	3	3	1	1	0	0	0	0	0	0	2	0	0	1	0	0	0	0	0	0	0	0	0	0	0	0	0	0	0	0	0	0	0	0	1	2	0	0
84	1	2	2	2	1	2	1	3	1	4	3	3	3	3	1	0	0	0	0	0	0	1	1	0	1	1	0	1	0	1	0	0	0	0	1	0	0	1	1	0	0	1	0	0	1	0	3	1	0
85	1	1	2	2	1	3	1	2	2	4	2	1	2	1	1	0	0	0	0	0	0	1	0	0	1	1	0	0	0	1	0	1	0	1	1	0	0	0	0	1	1	0	0	0	1	0	1	0	0
86	1	2	1	1	1	1	1	1	2	4	1	1	3	1	1	0	0	0	0	0	0	1	0	1	0	0	0	0	0	0	0	0	0	0	0	0	0	0	0	0	1	1	0	0	1	0	3	0	0
87	1	2	2	1	1	3	2	3	1	8	2	1	3	1	1	0	0	0	0	0	0	1	0	1	0	0	0	0	0	0	0	1	0	0	0	0	0	0	1	0	0	0	0	0	1	0	3	0	0
88	1	1	2	5	1	2	2	3	1	2	2	1	3	3	1	0	1	0	0	0	0	1	0	0	1	0	0	0	0	0	0	1	0	0	1	0	0	0	0	0	1	0	0	0	0	0	3	0	0
89	1	2	2	1	1	1	1	1	2	2	2	1	2	1	0	0	0	0	1	0	0	2	0	1	1	1	1	1	1	1	0	0	0	0	0	0	0	0	0	0	0	0	0	0	0	1	3	1	0
90	1	1	2	1	5	2	1	3	1	8	2	2	3	1	0	0	0	0	1	0	0	1	0	1	0	0	0	0	0	0	0	0	0	0	0	0	0	0	0	0	0	0	0	0	1	0	3	0	0
91	1	1	2	1	1	2	1	3	2	3	1	3	3	1	1	1	0	0	1	0	0	1	0	0	1	1	0	0	1	1	0	0	1	0	1	0	0	0	1	1	1	1	0	0	0	0	1	0	0
92	1	1	2	1	1	6	2	3	2	3	2	2	3	1	1	0	0	0	0	0	0	1	0	1	1	1	0	0	0	0	0	0	0	0	1	0	0	0	0	1	0	1	0	0	1	0	3	1	0
93	1	1	1	2	5	3	1	4	1	5	1	1	3	1	1	0	1	1	1	1	0	1	0	1	0	0	0	0	1	0	0	1	0	1	0	0	0	0	0	0	1	1	0	0	0	0	1	1	0
94	1	1	2	2	1	2	2	2	1	4	3	1	3	1	1	0	0	0	1	0	0	1	1	1	0	0	0	0	1	0	0	1	1	0	0	1	0	0	1	1	1	0	0	0	1	0	1	0	0
95	1	1	2	2	1	2	1	1	2	8	2	2	3	3	0	0	0	1	0	0	0	1	0	1	1	1	1	1	0	1	0	1	1	0	1	1	0	0	1	0	1	1	0	1	1	0	1	1	0
96	1	1	2	1	1	2	2	1	1	3	2	2	3	1	1	0	0	0	0	0	0	1	0	1	0	0	0	0	0	0	0	1	0	0	0	1	0	0	1	0	1	1	0	0	0	0	3	0	0
97	1	1	2	1	1	3	3	3	2	2	1	2	3	1	1	0	0	0	0	0	0	1	0	0	1	1	0	0	1	0	0	0	1	1	0	1	0	0	1	0	1	1	0	1	1	0	1	0	0
98	1	1	2	1	1	3	2	1	1	2	2	2	3	3	1	0	0	0	0	0	0	1	0	1	0	1	0	0	0	1	0	0	0	0	0	0	0	1	1	1	0	1	0	0	1	0	1	0	0
99	1	1	2	1	1	2	1	3	2	7	2	1	3	3	1	0	0	0	1	0	0	1	0	1	0	1	0	0	0	1	0	0	0	1	0	0	0	0	1	1	1	1	0	0	1	0	1	1	0
100	1	1	2	2	1	3	3	1	1	2	1	2	3	3	1	0	0	0	0	0	0	1	0	0	1	1	0	0	0	1	0	1	0	0	1	1	0	0	0	0	0	1	0	0	1	0	1	0	0
101	2	2	2	1	1	3	3	1	2	1	2	2	3	3	1	0	0	0	0	0	0	1	0	1	0	0	0	0	0	0	0	0	0	1	1	1	0	0	1	0	0	0	0	0	1	0	3	0	0
102	2	1	2	1	1	3	2	2	1	3	1	2	3	3	1	0	0	0	0	0	0	1	0	0	0	0	0	0	1	0	0	0	0	1	0	0	0	0	1	1	1	1	0	0	1	0	3	0	0
103	2	2	2	1	1	2	1	2	2	2	2	2	3	1	1	0	0	0	0	0	0	1	0	1	1	1	0	0	0	0	0	0	1	0	1	0	0	0	1	0	0	1	0	0	0	0	1	0	0
104	2	1	1	4	1	2	1	1	2	2	2	2	3	1	1	1	0	0	1	1	0	2	0	1	1	1	0	0	1	0	0	0	0	1	1	0	0	0	0	0	1	0	0	0	1	0	1	0	0
105	2	1	1	4	1	2	1	1	2	2	2	2	3	1	1	1	0	0	1	1	0	2	0	1	1	1	0	0	1	0	0	0	0	1	1	0	0	0	0	0	1	1	0	0	1	0	2	0	0
106	2	1	2	3	1	2	1	4	2	7	2	1	2	1	1	1	1	0	1	0	0	1	0	1	0	1	0	0	0	1	0	0	0	0	1	0	0	0	1	1	1	1	0	0	1	0	3	0	0
107	2	1	2	1	1	3	1	1	2	2	1	1	2	1	1	0	1	0	1	0	0	1	0	1	0	0	0	0	0	0	0	0	0	1	1	0	0	0	1	0	1	1	0	0	0	0	3	0	0
108	2	1	2	2	1	3	2	3	2	7	2	1	3	1	1	0	0	0	1	0	0	1	0	1	0	0	0	0	0	0	0	0	0	1	0	0	0	0	1	1	0	1	0	0	1	0	1	0	0
109	2	1	2	3	1	2	1	1	2	7	2	2	3	1	1	0	1	1	1	1	0	1	0	0	1	1	0	0	1	1	0	0	1	1	1	0	0	0	1	1	1	1	0	0	1	0	1	1	0
110	2	1	2	1	1	2	1	1	2	2	2	2	3	1	1	0	0	0	0	0	0	1	0	1	1	1	0	0	1	1	0	0	0	1	1	0	0	0	1	1	1	1	1	0	1	0	1	0	0
111	2	2	2	1	1	2	2	3	1	8	1	2	3	3	1	0	0	0	0	0	0	1	0	1	0	0	0	1	1	0	0	0	0	0	1	1	0	0	1	0	0	1	0	0	1	0	3	0	0
112	2	2	2	1	1	2	1	2	1	2	2	3	3	1	1	0	0	0	0	0	0	1	0	0	0	0	1	0	0	0	0	0	0	0	0	1	0	1	0	0	1	0	0	0	0	0	3	0	0
113	2	2	2	1	1	3	1	2	2	2	3	2	3	3	1	0	0	0	0	0	0	1	0	1	0	0	0	0	1	0	0	0	0	0	0	0	0	0	0	0	0	1	0	0	1	0	3	0	0
114	2	1	2	1	1	3	1	1	2	2	2	1	2	3	1	0	0	0	0	0	0	1	0	1	1	1	1	0	1	1	0	0	1	1	0	0	0	0	1	0	1	1	0	0	0	0	1	0	0
115	2	2	2	1	1	2	1	2	2	8	2	1	2	1	1	0	0	0	0	0	0	1	0	1	0	1	0	0	1	1	1	0	1	1	1	0	0	0	1	1	0	1	0	0	1	0	1	0	0
116	2	2	2	1	1	3	1	1	2	8	2	2	2	3	1	0	0	0	0	0	0	3	0	1	0	1	0	0	1	0	0	0	0	0	1	1	0	0	1	0	0	1	0	0	1	0	3	0	0
117	2	1	2	1	5	2	2	2	1	3	1	3	3	3	1	0	0	0	1	0	0	1	0	1	1	1	0	0	0	0	1	0	1	1	1	0	0	1	0	0	1	1	1	0	1	0	1	0	0
118	2	2	2	1	5	3	2	4	2	2	2	2	3	3	0	0	0	1	0	0	0	1	0	1	0	0	0	0	0	0	0	0	0	0	0	0	0	0	1	0	0	1	0	0	0	0	2	0	0
119	2	1	2	1	1	1	1	1	1	4	1	1	3	1	1	1	1	1	1	1	1	1	0	1	0	0	0	0	0	1	0	0	1	1	0	0	0	0	1	0	1	1	0	0	1	0	1	1	0
120	2	1	2	1	1	2	2	1	1	2	2	2	3	1	1	0	0	0	0	0	0	1	0	1	0	0	0	0	0	1	0	0	0	0	0	0	0	0	0	0	0	1	0	0	1	0	1	0	0
121	2	1	2	4	1	2	1	2	2	3	2	2	3	1	1	1	0	0	0	0	0	1	0	1	0	0	0	0	0	0	0	0	0	0	0	1	0	0	1	0	0	1	0	0	0	0	1	0	0
122	2	2	2	1	1	2	2	3	2	7	2	3	3	1	1	0	0	1	0	0	0	1	1	1	1	1	0	0	0	0	0	0	0	1	0	1	0	0	1	0	1	1	0	0	1	0	1	1	0
123	2	1	2	1	1	2	2	3	2	7	2	3	3	1	1	1	1	1	1	1	1	1	1	1	1	1	1	0	0	0	0	0	0	1	0	0	0	0	1	1	1	1	0	0	1	0	1	1	0
124	2	1	2	2	1	3	2	2	2	3	2	1	3	3	1	0	0	0	1	0	0	1	0	1	1	1	0	0	0	1	0	1	0	1	1	1	0	0	1	1	1	1	0	0	1	0	1	1	0
125	2	1	2	1	1	2	3	1	2	3	2	1	3	1	1	0	1	1	1	1	0	1	0	1	0	1	0	0	1	1	0	1	1	1	1	1	0	0	1	1	1	1	0	0	1	0	1	1	0
126	2	1	2	2	1	3	2	3	1	3	1	2	3	3	1	0	0	0	0	0	0	1	0	1	1	1	0	0	1	0	0	1	1	1	1	1	0	0	1	1	1	1	1	0	1	0	3	0	0
127	2	1	2	2	1	2	1	2	2	3	1	2	3	1	1	0	0	0	1	1	0	1	0	1	1	1	0	0	1	0	1	0	1	1	0	0	0	0	1	0	0	1	0	0	1	0	3	0	0
128	2	2	2	1	5	2	1	2	2	1	2	3	3	1	0	0	0	0	0	1	0	2	0	1	1	1	0	0	0	0	0	0	0	1	1	1	0	1	1	1	0	1	0	0	1	0	1	0	0
129	2	1	2	2	1	6	2	4	2	7	2	1	3	1	1	1	0	0	1	1	0	1	0	1	0	0	1	0	0	0	0	1	0	0	0	1	0	0	0	0	0	1	0	0	0	0	3	0	0
130	2	1	2	2	1	2	2	1	1	2	3	2	3	1	1	0	0	1	1	1	0	1	1	1	0	0	1	0	0	0	0	1	0	1	0	0	0	0	1	0	0	1	0	0	0	0	1	0	1
131	2	1	2	2	1	3	2	3	2	2	3	3	3	3	1	0	0	0	0	0	0	1	1	0	0	0	0	0	1	0	1	0	0	0	0	0	0	0	1	0	0	1	0	0	0	0	3	0	0
132	2	1	2	2	1	3	2	3	2	4	1	2	3	1	1	0	0	0	1	1	0	1	0	1	0	0	0	0	1	0	0	1	0	0	0	0	0	0	1	1	1	1	0	0	0	0	3	0	0
133	2	2	2	1	1	2	2	2	1	7	2	2	3	1	1	0	0	0	0	0	0	1	0	1	0	0	0	0	0	0	0	1	0	0	0	0	0	0	1	0	0	1	0	0	0	0	3	1	0
134	2	1	2	1	1	2	1	2	1	1	1	2	3	3	1	0	0	0	0	1	0	1	0	0	1	1	1	0	0	1	0	1	1	1	1	0	0	0	1	1	1	1	0	0	1	0	3	1	0
135	2	1	2	3	1	3	1	1	2	4	2	2	3	3	1	0	0	0	0	0	0	3	0	0	0	0	0	1	0	0	0	0	1	0	0	0	0	0	1	0	0	0	0	0	0	0	3	0	0
136	2	1	2	2	1	3	1	3	1	3	2	2	3	1	1	1	1	0	0	0	0	1	0	1	1	1	0	0	1	1	1	1	0	1	0	1	0	0	1	0	1	1	0	0	1	0	1	1	0
137	2	1	2	1	1	2	2	3	2	2	2	2	3	3	1	0	0	0	0	0	0	1	0	1	0	1	0	0	0	1	0	0	0	0	1	1	0	0	1	0	0	1	0	0	0	0	1	1	0
138	2	2	2	1	1	2	2	2	1	8	2	1	2	3	0	1	0	0	0	0	0	1	0	1	0	0	0	0	0	0	0	0	0	0	0	0	0	0	0	0	0	0	0	0	1	0	3	0	0
139	2	1	2	2	1	3	3	2	2	4	1	3	3	3	1	0	0	0	0	0	0	2	0	1	1	0	1	0	0	1	0	0	0	0	0	0	0	0	1	1	1	0	0	0	0	0	3	1	0
140	2	1	2	1	1	2	1	2	2	3	1	3	3	1	1	0	0	1	0	0	0	1	0	1	1	1	0	1	0	1	0	0	1	1	1	0	0	0	1	0	1	1	1	0	1	0	1	0	0
141	2	1	2	4	1	2	1	2	2	5	1	3	3	3	1	0	0	0	1	1	0	1	1	1	1	1	0	0	0	0	0	0	1	1	0	1	0	0	1	0	1	1	0	0	1	0	1	1	0
142	2	1	2	1	1	2	2	3	2	3	2	2	3	1	1	0	1	0	0	1	0	1	0	1	1	1	0	0	0	0	0	0	1	1	1	0	0	0	1	0	1	1	0	0	1	0	3	0	0
143	2	1	2	1	1	2	2	3	2	3	2	1	3	1	1	1	1	0	0	1	1	1	0	1	1	1	0	1	0	1	0	0	1	1	1	0	0	1	1	1	1	1	0	1	1	0	1	0	0
144	2	1	2	4	1	3	2	1	2	2	2	2	3	1	1	1	0	0	1	0	0	1	0	0	0	1	0	0	1	0	0	0	1	1	1	0	0	0	1	0	0	0	0	0	0	0	3	1	0
145	2	2	2	1	1	2	1	2	1	2	2	3	3	1	1	0	0	0	0	0	0	1	0	0	0	0	1	0	0	0	0	0	0	0	0	1	0	1	0	0	1	0	0	0	0	0	3	0	0
146	2	2	1	2	1	2	1	3	2	1	2	1	1	1	1	0	0	0	0	0	0	1	0	0	0	1	0	0	0	0	0	1	0	0	0	0	0	0	0	0	1	1	0	0	0	0	1	1	0
147	2	1	2	1	1	3	1	2	2	2	2	3	3	1	1	0	0	0	0	0	0	1	0	0	1	1	1	0	0	0	1	0	0	0	1	0	0	0	1	0	0	1	0	0	1	0	1	0	0
148	2	1	1	2	1	2	2	2	2	7	2	3	3	4	1	0	0	0	0	0	0	3	0	0	0	1	0	0	1	0	0	0	0	0	1	0	0	0	1	1	0	1	0	0	0	0	3	0	0
149	2	2	2	2	1	2	4	1	2	7	2	1	3	3	1	0	0	0	0	0	0	1	1	0	0	0	0	0	0	0	1	0	0	0	0	0	0	0	0	0	0	0	0	0	0	0	1	1	0
150	2	1	1	1	1	3	2	2	2	2	2	2	3	1	1	0	0	0	0	0	0	1	0	1	1	1	1	0	1	1	1	1	1	1	1	1	1	1	1	1	1	1	1	1	1	0	1	0	1
151	2	1	2	2	1	2	1	1	2	3	1	2	3	1	1	0	0	0	0	0	0	1	0	0	1	0	0	0	1	0	0	1	0	1	1	1	0	0	0	0	1	1	0	0	1	0	2	0	0
152	2	1	2	2	1	2	1	2	2	3	2	2	3	1	1	0	0	1	0	0	0	1	0	1	0	0	0	0	1	0	0	1	1	1	1	0	0	0	1	1	0	1	0	0	1	0	1	1	0
153	2	1	2	2	1	2	1	1	2	3	2	3	3	1	1	0	1	1	0	0	1	1	0	1	1	1	0	0	1	0	0	0	1	0	1	0	0	0	1	1	1	1	0	0	1	0	1	0	0
154	2	1	2	1	1	2	2	3	2	3	2	2	3	1	1	0	0	0	1	0	0	1	0	1	0	0	0	0	1	0	0	1	1	1	1	0	0	0	0	0	1	1	0	0	1	0	1	1	0
155	2	2	2	1	1	1	1	3	2	2	1	2	3	1	1	0	0	0	0	0	0	3	0	0	1	0	0	0	0	0	0	0	0	1	0	0	0	0	1	0	0	0	0	0	1	0	3	1	0
156	2	1	2	1	1	3	2	2	2	2	2	2	3	1	1	1	1	1	1	0	0	1	0	1	1	1	0	0	1	1	0	1	0	1	0	0	0	0	1	1	0	1	0	0	1	0	1	0	0
157	2	1	2	1	1	2	1	2	1	3	1	1	3	1	0	0	0	1	1	0	0	1	0	0	1	0	0	0	0	1	0	0	1	0	0	0	0	0	1	1	1	1	0	0	1	0	1	1	0
158	2	1	2	2	1	2	2	1	2	7	2	3	3	1	1	0	0	0	0	0	0	1	0	1	0	1	0	0	0	0	0	0	0	0	0	0	0	0	0	0	0	0	0	0	0	1	1	1	0
159	2	1	1	4	1	2	1	3	2	5	2	2	3	1	1	0	0	0	1	0	0	1	0	0	0	0	0	0	1	0	0	0	0	0	0	0	0	0	0	0	0	0	0	0	1	0	3	0	0
160	2	1	2	3	1	3	2	1	2	3	2	2	3	1	1	0	0	0	1	0	0	1	0	1	0	0	0	0	0	1	0	1	0	1	0	0	0	0	1	0	1	1	0	0	1	0	3	0	0
161	2	1	2	2	1	2	1	2	2	3	2	2	3	3	1	0	0	0	0	0	0	3	0	1	0	0	0	0	0	1	0	1	0	0	1	0	0	0	0	1	0	1	0	0	1	0	3	0	0
162	2	1	1	2	5	3	1	1	2	2	1	2	2	1	1	0	0	0	0	0	0	1	0	1	0	0	1	0	0	1	0	0	0	1	1	0	0	1	0	0	0	1	0	0	1	0	1	1	0
163	2	2	2	1	1	2	2	1	1	4	2	1	3	1	1	0	0	0	1	0	0	1	0	1	0	0	0	0	0	0	0	0	0	0	0	0	0	0	1	0	1	0	0	0	1	0	2	0	0
164	2	2	2	1	5	3	1	1	2	8	2	1	3	3	1	0	0	0	0	0	0	3	0	1	0	0	0	0	0	1	1	0	0	0	0	0	0	0	0	0	1	1	0	0	1	0	3	1	0
165	2	1	2	2	1	2	2	3	2	3	2	2	2	3	1	0	0	0	0	0	0	1	1	0	1	1	0	0	1	0	0	1	0	0	0	1	1	0	1	0	1	1	0	0	0	0	1	1	0
166	2	1	2	2	1	3	1	1	2	4	2	3	3	1	1	0	1	0	0	0	0	1	0	0	1	1	0	0	1	0	0	0	0	0	1	0	0	0	0	0	0	1	0	0	1	0	3	0	0
167	2	1	1	2	1	2	1	1	2	7	2	1	3	1	1	1	0	0	1	0	0	1	0	1	1	0	0	0	0	0	0	0	0	0	1	1	0	0	0	0	1	1	0	0	0	0	3	0	0
168	2	1	2	2	1	2	2	2	2	2	2	3	3	3	0	1	0	0	0	0	0	2	0	0	0	1	0	0	1	1	0	1	0	0	0	0	0	0	0	0	0	0	0	0	0	0	3	1	0
169	2	1	1	2	1	3	2	1	2	2	2	3	3	3	1	0	0	0	0	0	0	2	0	1	0	0	0	0	0	0	0	0	0	0	0	0	0	0	0	0	0	0	0	0	0	1	3	0	0
170	2	1	2	2	1	2	1	1	2	2	2	2	3	3	1	0	0	0	0	0	0	2	0	0	1	0	0	0	0	0	0	0	0	0	1	0	0	0	0	0	0	1	0	0	0	0	3	1	0
171	2	1	2	2	1	2	1	2	2	4	2	2	3	1	1	0	0	0	0	0	0	1	0	1	0	0	0	0	0	0	0	0	0	0	0	0	0	0	0	0	0	1	0	0	0	0	3	0	0
172	2	1	1	2	1	2	2	2	2	7	2	3	3	1	1	0	0	0	0	0	0	1	0	1	0	0	0	0	0	0	0	0	0	0	0	0	0	0	0	0	0	0	0	0	1	0	3	0	0
173	2	1	2	1	1	3	2	1	2	3	2	2	3	1	1	1	1	0	0	0	0	1	0	0	1	1	0	1	1	0	0	1	1	0	1	0	0	0	1	0	1	1	0	0	0	0	1	1	0
174	2	1	2	1	1	3	1	2	2	1	2	1	3	4	1	0	0	0	0	0	0	3	0	0	0	0	0	0	1	0	0	0	0	0	0	0	0	0	0	0	0	0	0	0	0	1	3	0	0
175	2	1	2	2	1	3	1	1	1	4	1	1	3	1	1	0	0	1	0	0	0	1	0	1	0	0	0	0	1	1	0	1	1	0	0	1	0	0	1	0	0	1	0	0	1	0	3	0	0
176	2	1	2	2	1	2	1	1	2	7	2	2	3	3	1	1	0	0	0	1	0	1	0	1	0	0	0	0	0	0	0	1	0	0	0	0	0	0	0	0	1	1	0	0	1	0	1	0	0
177	2	1	2	2	1	3	2	1	1	2	1	1	2	3	1	0	0	0	1	1	0	2	0	1	0	1	1	0	1	1	1	1	0	1	1	1	0	0	1	0	1	1	1	0	1	0	2	0	1
178	2	1	1	1	1	2	2	3	2	3	2	1	3	3	1	0	0	0	1	0	0	3	0	0	0	1	0	0	1	1	0	0	0	0	0	0	0	0	0	0	0	0	0	0	0	1	1	1	0
179	2	1	1	2	1	2	2	4	2	3	2	3	3	1	1	0	0	0	0	0	0	1	0	0	0	0	0	0	1	1	0	0	0	0	0	0	0	0	0	0	1	1	0	0	1	0	3	1	0
180	2	1	2	2	1	3	2	1	2	5	2	3	3	1	1	0	0	0	0	0	0	1	0	0	0	0	1	0	0	0	0	1	0	0	0	0	0	1	0	0	0	1	0	0	0	0	3	0	0
181	2	1	2	1	1	2	2	4	1	2	2	1	3	3	1	0	0	0	0	0	0	1	0	0	1	0	0	0	0	0	0	0	0	0	0	0	0	0	1	0	0	0	0	0	0	0	1	0	0
182	2	1	2	4	1	3	1	1	2	3	3	1	1	3	0	0	0	1	0	0	0	1	0	1	0	0	0	1	0	1	1	1	1	1	1	1	0	1	1	0	0	1	0	0	1	0	3	0	0
183	2	1	2	1	1	2	2	2	2	2	2	3	3	1	1	0	0	0	0	0	0	2	0	0	1	0	0	0	0	0	0	0	0	0	0	0	0	0	0	0	0	0	0	0	0	1	2	0	0
184	2	2	2	2	1	2	1	3	1	4	3	3	3	3	1	0	0	0	0	0	0	1	1	0	1	1	0	1	0	1	0	0	0	0	1	0	0	1	1	0	0	1	0	0	1	0	3	1	0
185	2	1	2	2	1	3	1	2	2	4	2	1	2	1	1	0	0	0	0	0	0	1	0	0	1	1	0	0	0	1	0	1	0	1	1	0	0	0	0	1	1	0	0	0	1	0	1	0	0
186	2	2	1	1	1	1	1	1	2	4	1	1	3	1	1	0	0	0	0	0	0	1	0	1	0	0	0	0	0	0	0	0	0	0	0	0	0	0	0	0	1	1	0	0	1	0	3	0	0
187	2	2	2	1	1	3	2	3	1	8	2	1	3	1	1	0	0	0	0	0	0	1	0	1	0	0	0	0	0	0	0	1	0	0	0	0	0	0	1	0	0	0	0	0	1	0	3	0	0
188	2	1	2	5	1	2	2	3	1	2	2	1	3	3	1	0	1	0	0	0	0	1	0	0	1	0	0	0	0	0	0	1	0	0	1	0	0	0	0	0	1	0	0	0	0	0	3	0	0
189	2	2	2	1	1	1	1	1	2	2	2	1	2	1	0	0	0	0	1	0	0	2	0	1	1	1	1	1	1	1	0	0	0	0	0	0	0	0	0	0	0	0	0	0	0	1	3	1	0
190	2	1	2	1	5	2	1	3	1	8	2	2	3	1	0	0	0	0	1	0	0	1	0	1	0	0	0	0	0	0	0	0	0	0	0	0	0	0	0	0	0	0	0	0	1	0	3	0	0
191	2	1	2	1	1	2	1	3	2	3	1	3	3	1	1	1	0	0	1	0	0	1	0	0	1	1	0	0	1	1	0	0	1	0	1	0	0	0	1	1	1	1	0	0	0	0	1	0	0
192	2	1	2	1	1	6	2	3	2	3	2	2	3	1	1	0	0	0	0	0	0	1	0	1	1	1	0	0	0	0	0	0	0	0	1	0	0	0	0	1	0	1	0	0	1	0	3	1	0
193	2	1	1	2	5	3	1	4	1	5	1	1	3	1	1	0	1	1	1	1	0	1	0	1	0	0	0	0	1	0	0	1	0	1	0	0	0	0	0	0	1	1	0	0	0	0	1	1	0
194	2	1	2	2	1	2	2	2	1	4	3	1	3	1	1	0	0	0	1	0	0	1	1	1	0	0	0	0	1	0	0	1	1	0	0	1	0	0	1	1	1	0	0	0	1	0	1	0	0
195	2	1	2	2	1	2	1	1	2	8	2	2	3	3	0	0	0	1	0	0	0	1	0	1	1	1	1	1	0	1	0	1	1	0	1	1	0	0	1	0	1	1	0	1	1	0	1	1	0
196	2	1	2	1	1	2	2	1	1	3	2	2	3	1	1	0	0	0	0	0	0	1	0	1	0	0	0	0	0	0	0	1	0	0	0	1	0	0	1	0	1	1	0	0	0	0	3	0	0
197	2	1	2	1	1	3	3	3	2	2	1	2	3	1	1	0	0	0	0	0	0	1	0	0	1	1	0	0	1	0	0	0	1	1	0	1	0	0	1	0	1	1	0	1	1	0	1	0	0
198	2	1	2	1	1	3	2	1	1	2	2	2	3	3	1	0	0	0	0	0	0	1	0	1	0	1	0	0	0	1	0	0	0	0	0	0	0	1	1	1	0	1	0	0	1	0	1	0	0
199	2	1	2	1	1	2	1	3	2	7	2	1	3	3	1	0	0	0	1	0	0	1	0	1	0	1	0	0	0	1	0	0	0	1	0	0	0	0	1	1	1	1	0	0	1	0	1	1	0
200	2	1	1	2	1	3	3	1	1	2	1	2	3	3	1	0	0	0	0	0	0	1	0	0	1	1	0	0	0	1	0	1	0	0	1	1	0	0	0	0	0	1	0	0	1	0	1	0	0
	1 - PNH	1 - woman	1 - 61-70 years	1 - married	1 - voivodship city	1 - very good	1 - higher	1 - one generation	1 - yes	1 - oily	1 - yes	1 - yes	1 - yes	1 - yes	1 - yes	1 - yes	1 - yes	1 - yes	1 - yes	1 - yes	1 - yes	1 - yes	1 - yes	1 - yes	1 - yes	1 - yes	1 - yes	1 - yes	1 - yes	1 - yes	1 - yes	1 - yes	1 - yes	1 - yes	1 - yes	1 - yes	1 - yes	1 - yes	1 - yes	1 - yes	1 - yes	1 - yes	1 - yes	1 - yes	1 - yes	1 - yes	1 - yes	1 - yes	1 - yes
	2 - U3A	2 - man	2 - ≥ 70 years	2 - widow/widower	2 - a big city above 200,000	2 - good	2 - secondary	2 - two generations	2 - no	2 - mixed	2 - no	2 - once so, not now	2 - once so, not now	2 - once so, not now	0 - no	0 - no	0 - no	0 - no	0 - no	0 - no	0 - no	2 - no	0 -no	0 -no	0 -no	0 -no	0 -no	0 -no	0 -no	0 -no	0 -no	0 -no	0 -no	0 -no	0 -no	0 -no	0 -no	0 -no	0 -no	0 -no	0 -no	0 -no	0 -no	0 -no	0 -no	0 -no	2 - no	0 -no	0 -no
				3 - single	3 - medium-sized city of 50-200,000	3 - average	3 - technical	3 - three generations		3 - dry	3 - I don't know	3 - no	3 - no	3 - no								3 - I don't know																									3 - I don't know
				4 - divorced	4 - a small town to 50,000	4 - rather bad	4 - vocational	4 - many generations		4 - sensitive				4 - I don't know
				5 - separation	5 - village	5 - bad	5 - primary			5 - couperose
						6 - hard to say				6 - acne
										7 - mature
										8 - I don't know
[truncated: 47 more columns]

## Sheet: RESULTS
TOTAL
Sex				PNH		U3A
women	136	0.68		59	0.59	77	0.77
men	64	0.32		41	0.41	23	0.23
Age
61-70 years	75	0.375		43	0.43	39	0.39
≥ 70 years	125	0.625		57	0.57	61	0.61
Marital status
married	60	0.3		10	0.1	50	0.5
widow/widower	85	0.425		47	0.47	38	0.47
single	30	0.15		26	0.26	4	0.26
divorced	24	0.12		17	0.17	7	0.17
separation	1	0.005		0	0	1	0
Place of residence
voivodship city	183	0.915		90	0.9	93	0.93
a big city above 200,000	0	0		0	0	0	0
medium-sized city of 50-200,000	3	0.015		3	0.03	0	0
a small town to 50,000	3	0.015		3	0.03	0	0
village	11	0.055		4	0.04	7	0.07
Financial situation
very good	4	0.02		0	0	4	0.04
good	79	0.395		21	0.21	58	0.58
average	90	0.45		54	0.54	36	0.36
rather bad	12	0.06		12	0.12	0	0
bad	9	0.045		9	0.09	0	0
hard to say	6	0.03		4	0.04	2	0.02
Level of education
higher	65	0.325		15	0.15	50	0.5
secondary	70	0.35		26	0.26	44	0.44
technical	17	0.085		12	0.12	5	0.05
vocational	28	0.14		27	0.27	1	0.01
primary	20	0.1		20	0.2	0	0
Kind of skin
oily	13	0.065		8	0.08	5	0.05
mixed	66	0.33		35	0.35	31	0.31
dry	51	0.255		25	0.25	26	0.26
sensitive	23	0.115		11	0.11	12	0.12
couperose	5	0.025		1	0.01	4	0.04
acne	0	0		0	0	0	0
mature	21	0.105		7	0.07	14	0.14
I don't know	21	0.105		13	0.13	8	0.08
Have you ever had skin problems?
yes	57	0.285		34	0.34	23	0.23
no	125	0.625		54	0.54	71	0.76
I don't know	18	0.09		12	0.12	6	0.06
You are tanning in the sun?
yes	56	0.28		25	0.25	31	0.31
once so, not now	85	0.425		39	0.39	46	0.46
no	59	0.295		36	0.36	23	0.23
You are tanning in the solarium?
yes	2	0.01		0	0	2	0.02
once so, not now	12	0.06		1	0.01	11	0.11
no	186	0.93		99	0.99	87	0.87
Are you protecting your skin with special protective preparations?
yes	106	0.53		43	0.43	63	0.63
once so, not now	13	0.065		13	0.13	0	0
no	77	0.385		42	0.42	35	0.35
I don't know	4	0.02		2	0.02	2	0.02
Do you use creams?
yes	173	0.865		82	0.82	91	0.91
no	27	0.135		18	0.18	9	0.09
Do you use tonics?
yes	26	0.13		9	0.09	17	0.17
no	174	0.87		91	0.91	83	0.83
Do you use masks?
yes	19	0.095		4	0.04	15	0.15
no	181	0.905		96	0.96	85	0.85
Do you use olives?
yes	58	0.29		42	0.42	16	0.16
no	142	0.71		58	0.58	84	0.84
Do you use lotions?
yes	56	0.23		24	0.24	32	0.32
no	144	0.77		76	0.76	68	0.68
Do you use peelings?
yes	18	0.09		0	0	18	0.18
no	182	0.91		100	1	82	0.82
Are you walking to beauty salons?
yes	4	0.02		0	0	4	0.04
no	196	0.98		100	1	96	0.96
Have you noticed in yourself qualities of skin aging?
yes	161	0.815		79	0.79	82	0.82
no	19	0.095		9	0.09	10	0.1
I don't know	20	0.1		12	0.12	8	0.08
Do you think that factor in the skin aging are infections?
yes	29	0.145		20	0.2	9	0.09
no	171	0.855		80	0.8	91	0.91
Do you think that factor in skin aging is the general condition of the organism?
yes	120	0.6		53	0.53	67	0.67
no	80	0.4		47	0.47	33	0.33
Do you think that factor in the skin aging is tanning?
yes	76	0.38		33	0.33	43	0.43
no	124	0.62		67	0.67	57	0.57
Do you think that factor in skin aging is smoking?
yes	98	0.49		50	0.5	48	0.48
no	102	0.51		50	0.5	52	0.52
Do you think that factor in aging is contamination?	35	0.175		20	0.2	15	0.15
yes	165	0.825		80	0.8	85	0.85
no
Do you think that factor in aging is to use cosmetics too young?
yes	21	0.105		12	0.12	9	0.09
no	179	0.895		88	0.88	91	0.91
Do you think that factor in aging is stress?
yes	77	0.385		38	0.38	39	0.39
no	123	0.615		62	0.62	61	0.61
Do you think that factor in skin aging are genetic burdens?
yes	63	0.315		27	0.27	36	0.36
no	137	0.685		73	0.73	64	0.64
Do you think that the stigma of the skin is paleness?
yes	21	0.105		10	0.1	11	0.11
no	179	0.895		90	0.9	89	0.89
Do you think that the stigma of the skin is onychorrhexis?
yes	47	0.235		14	0.14	33	0.33
no	153	0.765		86	0.86	67	0.67
Do you think that the stigma of the skin is hyperkeratosis?
yes	58	0.29		30	0.3	28	0.28
no	142	0.71		70	0.7	72	0.72
Do you think that the stigma of the skin is irregular skin pigmentation?
yes	76	0.38		35	0.35	41	0.41
no	124	0.62		65	0.65	59	0.59
Do you think that the stigma of the skin are lentigo?
yes	61	0.305		17	0.17	44	0.44
no	139	0.695		83	0.83	56	0.56
Do you think that the stigma of the skin is diffuse thinning hair?
yes	63	0.315		26	0.26	37	0.37
no	137	0.685		74	0.74	63	0.63
Do you think that the stigma of the skin is the formation of bubbles?
yes	6	0.03		4	0.04	2	0.02
no	194	0.97		96	0.96	98	0.98
Do you think that the stigma of the skin is slowing down the process of wound healing?
yes	35	0.175		24	0.24	11	0.11
no	165	0.825		76	0.76	89	0.89
Do you think that the stigma of the skin is rough and graying hair?
yes	101	0.505		40	0.4	61	0.61
no	99	0.495		60	0.6	39	0.39
Do you think that the stigma of the skin are telangiectasia?
yes	51	0.255		23	0.23	28	0.28
no	149	0.745		77	0.77	72	0.72
Do you think that the stigma of the skin is drying?
yes	74	0.37		24	0.24	50	0.5
no	126	0.63		76	0.76	50	0.5
Do you think that the stigma of the skin are wrinkles?
yes	161	0.805		87	0.87	74	0.74
no	39	0.195		13	0.13	26	0.26
Do you think that the stigma of the skin is to reduce the insulation and protective properties of the skin?
yes	13	0.065		7	0.07	6	0.06
no	187	0.935		93	0.93	94	0.94
Do you think that the stigma of the skin is increased incidence of benign and malignant tumors of epithelial origin?
yes	12	0.06		8	0.08	4	0.04
no	188	0.94		92	0.92	96	0.96
Do you think that the stigma of the skin is flaccidity?
yes	112	0.56		49	0.49	63	0.63
no	88	0.44		51	0.51	37	0.37
Stigmata of the skin - I don't know
yes	13	0.065		7	0.07	6	0.06
no	187	0.935		93	0.93	94	0.94
The most common skin problems - warts
yes	58	0.29		24	0.24	34	0.34
no	142	0.71		76	0.76	66	0.66
The most common skin problems - vesicular diseases
yes	8	0.04		5	0.05	3	0.03
no	192	0.96		95	0.95	97	0.97
The most common skin problems - mycoses
yes	78	0.39		42	0.42	36	0.36
no	122	0.61		58	0.58	64	0.64
The most common skin problems -xanthoma
yes	12	0.06		3	0.03	9	0.09
no	188	0.94		97	0.97	91	0.91
The most common skin problems - seborrheic dermatitis
yes	19	0.095		7	0.07	12	0.12
no	181	0.905		93	0.93	88	0.88
The most common skin problems - cancers
yes	28	0.14		21	0.21	7	0.07
no	172	0.86		79	0.79	93	0.93
The most common skin problems - drug reactions
yes	10	0.05		7	0.07	3	0.03
no	190	0.95		93	0.93	97	0.97
The most common skin problems - bedsores
yes	49	0.245		35	0.35	14	0.14
no	151	0.755		65	0.65	86	0.86
The most common skin problems - chafes
yes	29	0.145		14	0.14	15	0.15
no	171	0.855		86	0.86	85	0.85
The most common skin problems - crural ulceration
yes	37	0.185		29	0.29	8	0.08
no	163	0.815		71	0.71	92	0.92
The most common skin problems - herpes zoster
yes	21	0.105		14	0.14	7	0.07
no	179	0.895		86	0.86	93	0.93
The most common skin problems - actinic keratoses
yes	59	0.295		23	0.23	36	0.36
no	141	0.705		77	0.77	64	0.64
The most common skin problems - cutaneous horn
yes	3	0.015		1	0.01	2	0.02
no	197	0.985		99	0.99	98	0.98
The most common skin problems - erysipelas
yes	4	0.02		3	0.03	1	0.01
no	196	0.98		97	0.97	99	0.99
The most common skin problems - various types of eczema
yes	16	0.08		6	0.06	10	0.1
no	184	0.92		94	0.94	90	0.9
The most common skin problems - pruritus
yes	46	0.23		20	0.2	26	0.26
no	154	0.77		80	0.8	74	0.74
The most common skin problems - fibromas
yes	8	0.04		0	0	8	0.08
no	192	0.96		0	0	92	0.92
The most common skin problems - stasis dermatitis
yes	15	0.075		11	0.11	4	0.04
no	185	0.925		89	0.89	96	0.96
The most common skin problems - moles
yes	79	0.395		46	0.46	33	0.33
no	121	0.605		54	0.54	67	0.67
The most common skin problems - I don't know
yes	28	0.14		11	0.11	17	0.17
no	172	0.86		89	0.89	83	0.83
How would you rate your knowledge of skin diseases in the elderly?
very good	1	0.005		0	0	1	0.01
good	24	0.12		8	0.08	16	0.16
average	82	0.41		36	0.36	46	0.46
low	52	0.26		35	0.35	17	0.17
very low	13	0.065		9	0.09	4	0.04
hard to say	28	0.14		12	0.12	16	0.16
Source of information on skin diseases in the elderly - TV
yes	85	0.425		38	0.38	47	0.47
no	115	0.575		62	0.62	53	0.53
Source of information on skin diseases in the elderly - newspapers
yes	88	0.44		38	0.38	50	0.5
no	112	0.56		62	0.62	50	0.5
Source of information on skin diseases in the elderly - radio
yes	24	0.12		9	0.09	15	0.15
no	176	0.88		91	0.91	85	0.85
Source of information on skin diseases in the elderly - Internet
yes	59	0.295		11	0.11	48	0.48
no	141	0.705		89	0.89	52	0.52
Source of information on skin diseases in the elderly - advertisings
yes	19	0.095		10	0.1	9	0.09
no	181	0.905		90	0.9	91	0.91
Source of information on skin diseases in the elderly - chlindren/grandchildren
yes	15	0.075		12	0.12	3	0.03
no	185	0.925		88	0.88	97	0.97
Source of information on skin diseases in the elderly - friends
yes	36	0.18		25	0.25	11	0.11
no	164	0.82		75	0.75	89	0.89
Source of information on skin diseases in the elderly - doctor
yes	88	0.44		55	0.55	33	0.33
no	112	0.56		45	0.45	67	0.67
Source of information on skin diseases in the elderly - nurse
yes	25	0.125		19	0.19	6	0.06
no	175	0.875		81	0.81	94	0.94
Source of information on skin diseases in the elderly - pharmacist
yes	22	0.11		9	0.09	13	0.13
no	178	0.89		91	0.91	87	0.87
Source of information on skin diseases in the elderly - own experience
yes	69	0.345		30	0.3	39	0.39
no	131	0.655		70	0.7	61	0.61
Would you like to be educated in the field of skin diseases of old age?
yes	121	0.605		49	0.49	72	0.72
no	17	0.085		10	0.1	7	0.07
I don't know	62	0.31		41	0.41	21	0.21

## Sheet: CHI-SQUERED TEST
Do you use creams?	YES	NO	TOTAL
PNH	82	18	100
U3A	91	9	100
TOTAL	173	27	200
chi2	3.46821
p	0.062559
Do you use tonics?	YES	NO	TOTAL
PNH	9	91	100
U3A	17	83	100
TOTAL	26	174	200
chi2	2.82935
p	0.0925556
Do you use masks?	YES	NO	TOTAL
PNH	4	96	100
U3A	15	85	100
TOTAL	1	181	200
chi2	133.702
p	6.34945e-31
Do you use olives?	YES	NO	TOTAL
PNH	42	58	100
U3A	16	84	100
TOTAL	58	142	200
chi2	16.4157
p	5.08612e-05
Do you use lotions?	YES	NO	TOTAL
PNH	24	76	100
U3A	32	68	100
TOTAL	56	144	200
chi2	1.5873
p	0.207712
Do you use peelings?	YES	NO	TOTAL
PNH	0	100	100
U3A	18	82	100
TOTAL	18	182	200
chi2	19.7802
p	8.68771e-06
Are you walking to beauty salons?	YES	NO	TOTAL
PNH	0	100	100
U3A	4	96	100
TOTAL	4	196	200
chi2	4.08163
p	0.0433518
Do you think that factor in the skin aging are infections?	YES	NO	TOTAL
PNH	20	80	100
U3A	9	91	100
TOTAL	29	171	200
chi2	4.88002
p	0.0271694
Do you think that factor in skin aging is the general condition of the organism?	YES	NO	TOTAL
PNH	53	47	100
U3A	67	33	100
TOTAL	120	80	200
chi2	4.08333
p	0.0433081
Do you think that factor in the skin aging is tanning?	YES	NO	TOTAL
PNH	33	67	100
U3A	43	57	100
TOTAL	76	124	200
chi2	2.12224
p	0.145174
Do you think that factor in skin aging is smoking?	YES	NO	TOTAL
PNH	50	50	100
U3A	48	52	100
TOTAL	98	102	200
chi2	0.080032
p	0.777254
Do you think that factor in aging is contamination?	YES	NO	TOTAL
PNH	20	80	100
U3A	15	85	100
TOTAL	35	165	200
chi2	0.865801
p	0.35212
Do you think that factor in aging is to use cosmetics too young?	YES	NO	TOTAL
PNH	12	88	100
U3A	9	91	100
TOTAL	21	179	200
chi2	0.478851
p	0.488943
Do you think that factor in aging is stress?	YES	NO	TOTAL
PNH	38	62	100
U3A	39	61	100
TOTAL	77	123	200
chi2	0.0211171
p	0.88446
Do you think that factor in skin aging are genetic burdens?	YES	NO	TOTAL
PNH	27	73	100
U3A	36	64	100
TOTAL	63	137	200
chi2	1.87696
p	0.170681
Do you think that the stigma of the skin is paleness?	YES	NO	TOTAL
PNH	10	90	100
U3A	11	89	100
TOTAL	21	179	200
chi2	0.0532056
p	0.817576
Do you think that the stigma of the skin is onychorrhexis?	YES	NO	TOTAL
PNH	14	86	100
U3A	33	67	100
TOTAL	47	153	200
chi2	10.0403
p	0.0015315
Do you think that the stigma of the skin is hyperkeratosis?	YES	NO	TOTAL
PNH	30	70	100
U3A	28	72	100
TOTAL	58	142	200
chi2	0.0971345
p	0.755296
Do you think that the stigma of the skin is irregular skin pigmentation?	YES	NO	TOTAL
PNH	35	65	100
U3A	41	59	100
TOTAL	76	124	200
chi2	0.764007
p	0.382078
Do you think that the stigma of the skin are lentigo?	YES	NO	TOTAL
PNH	17	83	100
U3A	44	56	100
TOTAL	61	139	200
chi2	17.1954
p	3.37248e-05
Do you think that the stigma of the skin is diffuse thinning hair?	YES	NO	TOTAL
PNH	26	74	100
U3A	37	63	100
TOTAL	63	137	200
chi2	2.80385
p	0.0940385
Do you think that the stigma of the skin is the formation of bubbles?	YES	NO	TOTAL
PNH	4	96	100
U3A	2	98	100
TOTAL	6	194	200
chi2	0.687285
p	0.407089
Do you think that the stigma of the skin is slowing down the process of wound healing?	YES	NO	TOTAL
PNH	24	76	100
U3A	11	89	100
TOTAL	35	165	200
chi2	5.85281
p	0.0155522
Do you think that the stigma of the skin is rough and graying hair?	YES	NO	TOTAL
PNH	40	60	100
U3A	61	39	100
TOTAL	101	99	200
chi2	8.82088
p	0.00297803
Do you think that the stigma of the skin are telangiectasia?	YES	NO	TOTAL
PNH	23	77	100
U3A	28	72	100
TOTAL	51	149	200
chi2	0.657981
p	0.417274
Do you think that the stigma of the skin is drying?	YES	NO	TOTAL
PNH	24	76	100
U3A	50	20	100
TOTAL	74	126	200
chi2	23.6431
p	1.15963e-06
Do you think that the stigma of the skin are wrinkles?	YES	NO	TOTAL
PNH	87	13	100
U3A	74	26	100
TOTAL	161	39	200
chi2	5.38302
p	0.0203336
Do you think that the stigma of the skin is to reduce the insulation and protective properties of the skin?	YES	NO	TOTAL
PNH	7	93	100
U3A	6	94	100
TOTAL	13	187	200
chi2	0.0822707
p	0.774244
Do you think that the stigma of the skin is increased incidence of benign and malignant tumors of epithelial origin?	YES	NO	TOTAL
PNH	8	92	100
U3A	4	96	100
TOTAL	12	188	200
chi2	1.41844
p	0.23366
Do you think that the stigma of the skin is flaccidity?	YES	NO	TOTAL
PNH	49	51	100
U3A	63	37	100
TOTAL	112	88	200
chi2	3.97727
p	0.0461182
Stigmata of the skin - I don't know	YES	NO	TOTAL
PNH	7	93	100
U3A	6	94	100
TOTAL	13	187	200
chi2	0.0822707
p	0.774244
The most common skin problems - warts	YES	NO	TOTAL
PNH	24	76	100
U3A	34	66	100
TOTAL	58	132	200
chi2	2.61233
p	0.106036
The most common skin problems - vesicular diseases	YES	NO	TOTAL
PNH	5	95	100
U3A	3	97	100
TOTAL	8	192	200
chi2	0.520833
p	0.470486
The most common skin problems - mycoses	YES	NO	TOTAL
PNH	42	58	100
U3A	36	64	100
TOTAL	78	122	200
chi2	0.75662
p	0.384388
The most common skin problems -xanthoma	YES	NO	TOTAL
PNH	3	97	100
U3A	9	91	100
TOTAL	12	188	200
chi2	3.19149
p	0.0740225
The most common skin problems - seborrheic dermatitis	YES	NO	TOTAL
PNH	7	93	100
U3A	12	88	100
TOTAL	19	181	200
chi2	1.45391
p	0.227901
The most common skin problems - cancers	YES	NO	TOTAL
PNH	21	79	100
U3A	7	93	100
TOTAL	28	172	200
chi2	8.13953
p	0.00433104
The most common skin problems - drug reactions	YES	NO	TOTAL
PNH	7	93	100
U3A	3	97	100
TOTAL	10	190	200
chi2	1.68421
p	0.194366
The most common skin problems - bedsores	YES	NO	TOTAL
PNH	35	65	100
U3A	14	86	100
TOTAL	49	151	200
chi2	11.9205
p	0.000555187
The most common skin problems - chafes	YES	NO	TOTAL
PNH	14	86	100
U3A	15	85	100
TOTAL	29	171	200
chi2	0.0403307
p	0.840835
The most common skin problems - crural ulceration	YES	NO	TOTAL
PNH	29	71	100
U3A	8	92	100
TOTAL	37	163	200
chi2	14.6244
p	0.000131202
The most common skin problems - herpes zoster	YES	NO	TOTAL
PNH	14	86	100
U3A	7	93	100
TOTAL	21	179	200
chi2	2.60708
p	0.106388
The most common skin problems - actinic keratoses	YES	NO	TOTAL
PNH	23	77	100
U3A	36	64	100
TOTAL	59	141	200
chi2	4.06299
p	0.0438329
The most common skin problems - cutaneous horn	YES	NO	TOTAL
PNH	1	99	100
U3A	2	98	100
TOTAL	3	197	200
chi2	0.338409
p	0.560749
The most common skin problems - erysipelas	YES	NO	TOTAL
PNH	3	97	100
U3A	1	99	100
TOTAL	4	196	200
chi2	1.02041
p	0.312422
The most common skin problems - various types of eczema	YES	NO	TOTAL
PNH	6	94	100
U3A	10	90	100
TOTAL	16	184	200
chi2	1.08696
p	0.297147
The most common skin problems - pruritus	YES	NO	TOTAL
PNH	20	80	100
U3A	26	74	100
TOTAL	46	154	200
chi2	1.01637
p	0.31338
The most common skin problems - fibromas	YES	NO	TOTAL
PNH	0	100	100
U3A	8	92	100
TOTAL	8	192	200
chi2	8.33333
p	0.00389242
The most common skin problems - stasis dermatitis	YES	NO	TOTAL
PNH	11	89	100
U3A	4	96	100
TOTAL	15	185	200
chi2	3.53153
p	0.0602121
The most common skin problems - moles	YES	NO	TOTAL
PNH	46	54	100
U3A	33	67	100
TOTAL	79	121	200
chi2	3.53593
p	0.0600525
The most common skin problems - I don't know	YES	NO	TOTAL
PNH	11	89	100
U3A	17	83	100
TOTAL	28	172	200
chi2	1.49502
p	0.22144
Source of information on skin diseases in the elderly - TV	YES	NO	TOTAL
PNH	38	62	100
U3A	47	53	100
TOTAL	85	115	200
chi2	1.65729
p	0.19797
Source of information on skin diseases in the elderly - newspapers	YES	NO	TOTAL
PNH	38	62	100
U3A	50	50	100
TOTAL	88	112	200
chi2	2.92208
p	0.0873753
Source of information on skin diseases in the elderly - radio	YES	NO	TOTAL
PNH	9	91	100
U3A	15	85	100
TOTAL	24	176	200
chi2	1.70455
p	0.191695
Source of information on skin diseases in the elderly - Internet	YES	NO	TOTAL
PNH	11	89	100
U3A	48	52	100
TOTAL	59	141	200
chi2	32.9126
p	9.6396e-09
Source of information on skin diseases in the elderly - advertisings	YES	NO	TOTAL
PNH	10	90	100
U3A	9	91	100
TOTAL	19	181	200
chi2	0.0581564
p	0.809434
Source of information on skin diseases in the elderly - chlindren/grandchildren	YES	NO	TOTAL
PNH	12	88	100
U3A	3	97	100
TOTAL	15	185	200
chi2	5.83784
p	0.0156851
Source of information on skin diseases in the elderly - friends	YES	NO	TOTAL
PNH	25	75	100
U3A	11	89	100
TOTAL	36	164	200
chi2	6.63957
p	0.00997382
Source of information on skin diseases in the elderly - doctor	YES	NO	TOTAL
PNH	55	45	100
U3A	33	67	100
TOTAL	88	112	200
chi2	9.82143
p	0.0017249
Source of information on skin diseases in the elderly - nurse	YES	NO	TOTAL
PNH	19	81	100
U3A	6	94	100
TOTAL	25	175	200
chi2	7.72571
p	0.00544398
Source of information on skin diseases in the elderly - pharmacist	YES	NO	TOTAL
PNH	9	91	100
U3A	13	87	100
TOTAL	22	178	200
chi2	0.81716
p	0.366012
Source of information on skin diseases in the elderly - own experience	YES	NO	TOTAL
PNH	30	70	100
U3A	39	61	100
TOTAL	69	131	200
chi2	1.79223
p	0.180654
